# Supplementary material
Source: Springer Nature journal article supplement (https://www.springermedizin.de/resource/supplementary/12889_2006_602_MOESM6_ESM.pdf/9501264)

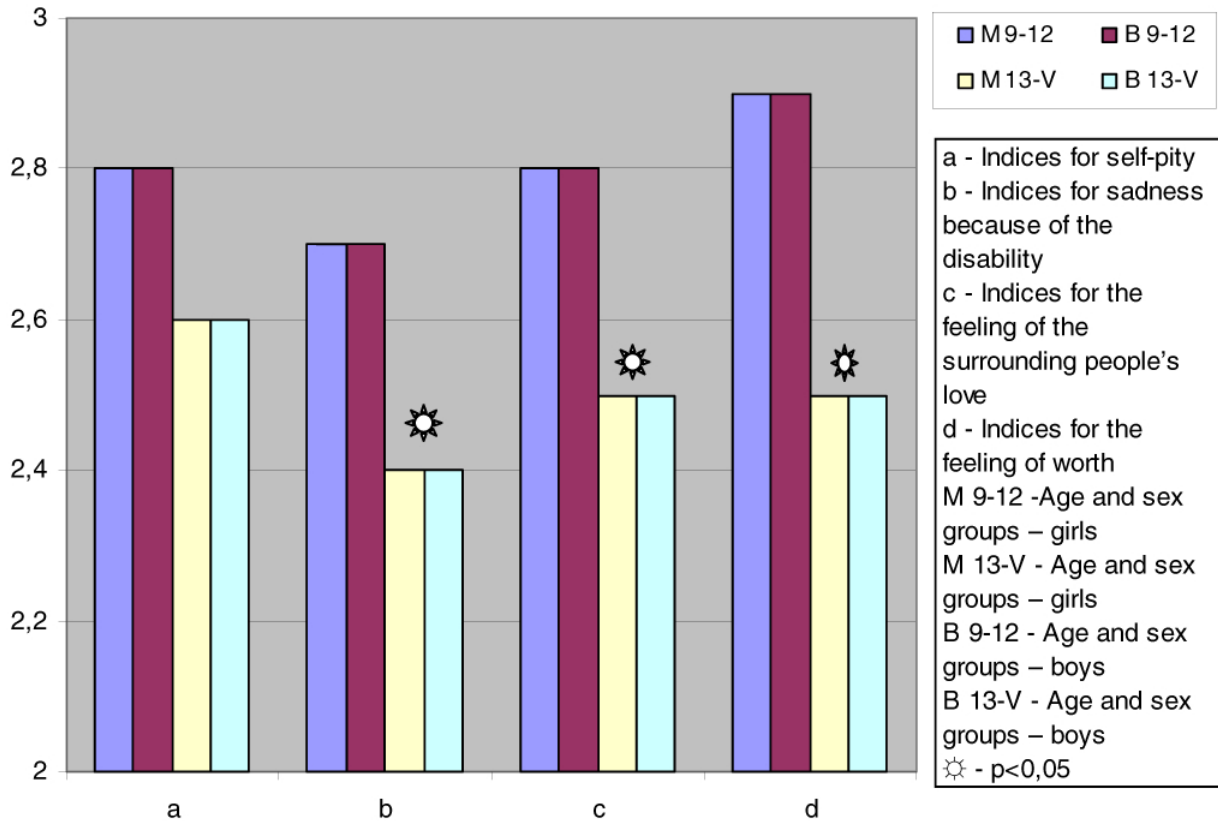

Supplement: MOESM6 [file 9501264]
